# Supplementary material
Source: MDPI journal article supplement (https://www.mdpi.com/2673-7655/4/2/13)
Supplement: s1 [file s1]

*Supplementary Material*

## **Evaluation of the plant growth promoter SPGP4, from in silico to agricultural**

Guiee N. López-Castillo <sup>1</sup>, Arnoldo Wong-Villareal <sup>2</sup>, M. Judith Castellanos-Moguel <sup>3</sup>, Gilberto Vela Correa <sup>3</sup>, Sandra L. Cabera-Hilerio <sup>4</sup>, Mariana Miranda-Arámbula <sup>5</sup>, Alan Carrasco-Carballo <sup>1,\*</sup> and Jesús Sandoval-Ramírez <sup>6,\*</sup>

<sup>1</sup> Laboratorio de Elucidación y Síntesis en Química Orgánica, ICUAP-BUAP; 72570, Puebla, México. alan.carrascoc@correo.buap.mx

<sup>2</sup> Universidad Tecnológica de la Selva, 29950, Ocosingo, Chiapas; wova79@hotmail.com

<sup>3</sup> Universidad Autónoma Metropolitana-Xochimilco; 04960, CDMX, México; mjmoguel@correo.xoc.uam.mx

<sup>4</sup> Facultad de Ciencias Químicas-BUAP; 72570, Puebla, México; sandra.cabrera@correo.buap.mx

<sup>5</sup> Centro de Investigación en Biotecnología Aplicada-IPN; 90700 Tepetitla de Lardizábal, Tlaxcala, México. mmirandaa@ipn.mx

<sup>6</sup> Laboratorio de Síntesis y Modificación de Productos Naturales, FCQ-BUAP; Puebla 72570, México. jesus.sandoval@correo.buap.mx

<sup>7</sup> CONAHCYT, LESQO, ICUAP-BUAP, 72570, Puebla, México. alan.carrasco@conahcyt.mx

\*Correspondence: alan.carrascoc@correo.buap.mx (A.C.C.); jesus.sandoval@correo.buap.mx (J.S.R.)

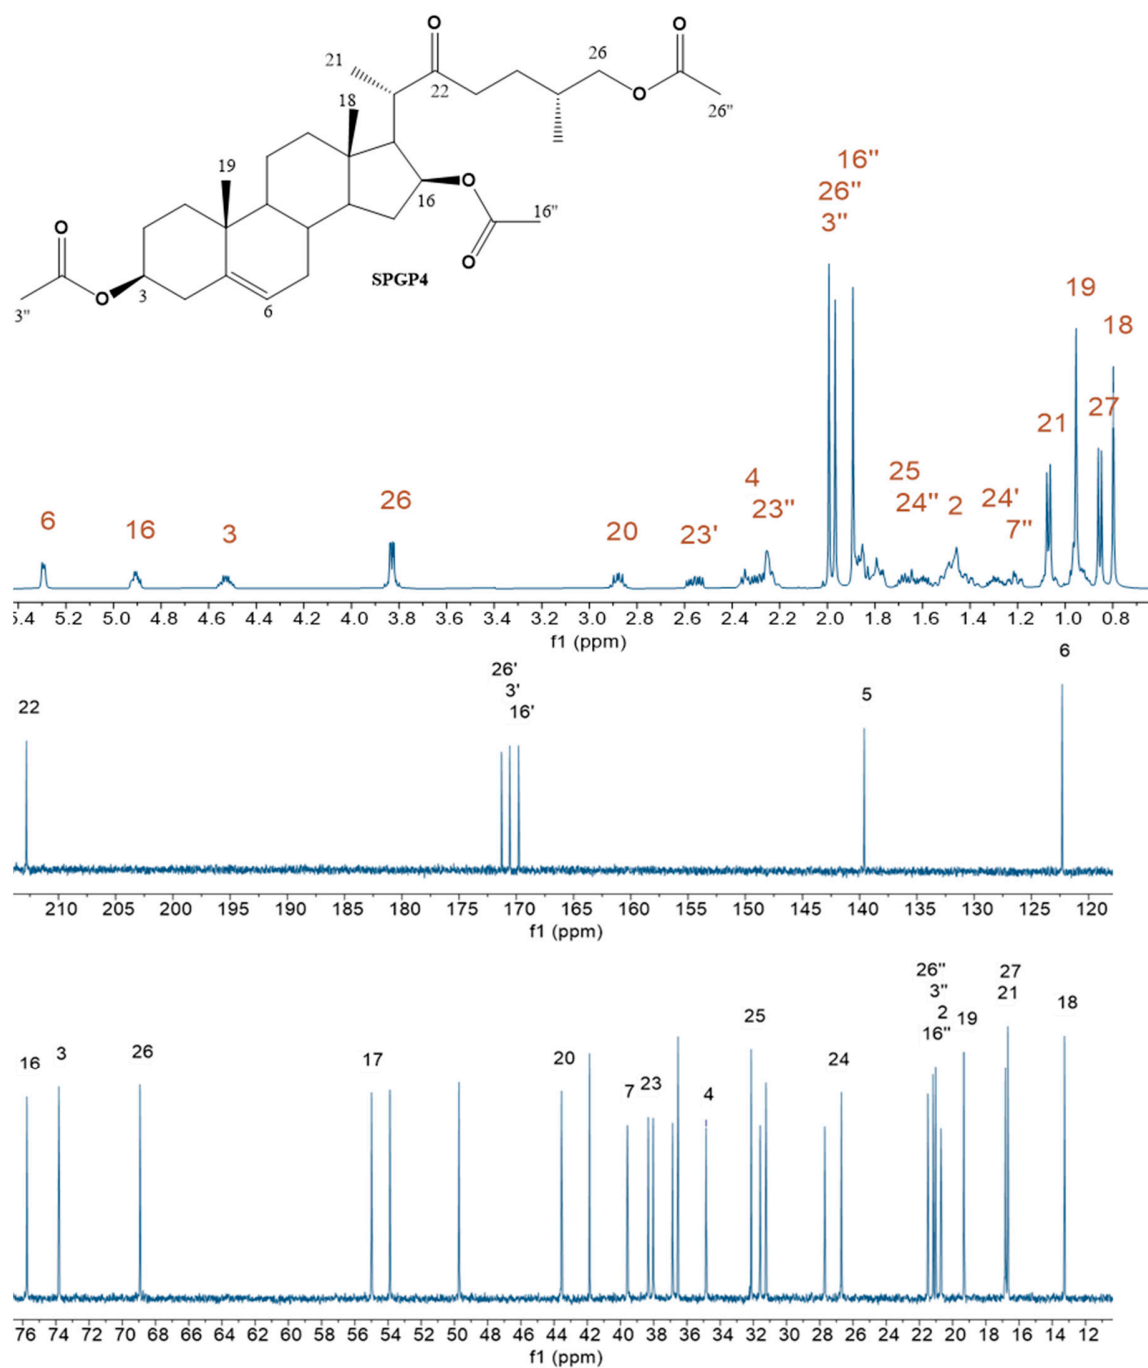

**Figure S1.**  $^1\text{H}$  and  $^{13}\text{C}$  NMR at 500 and 125 MHz respectively of SPGP4 for structure validation.

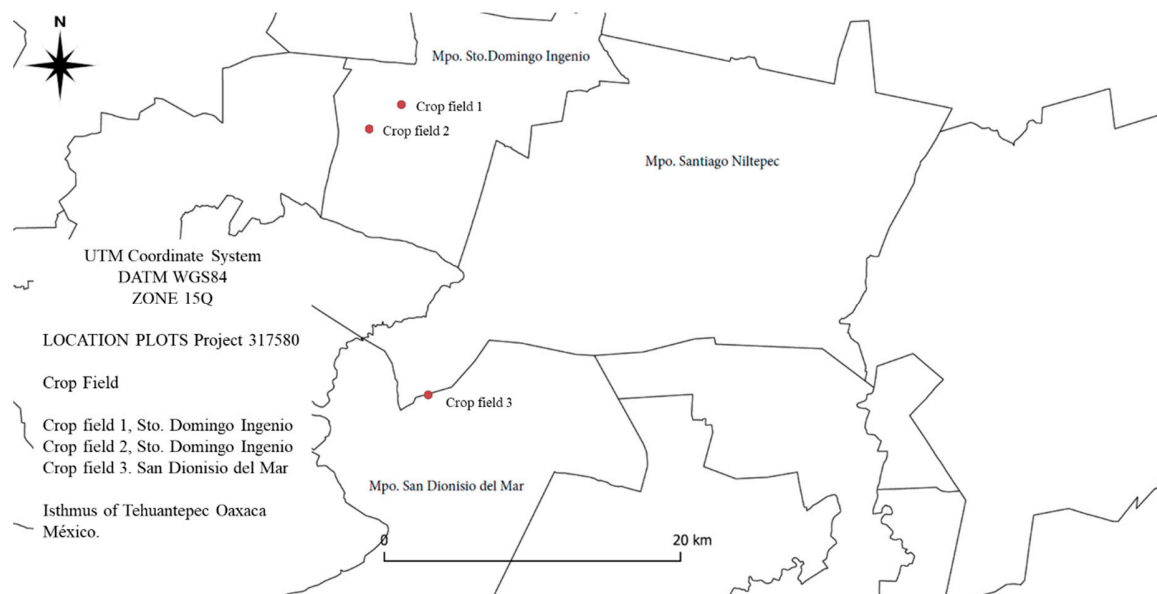

**Figure S2.** Map of the Isthmus of Tehuantepec region of Oaxaca used as a study model for the crop field evaluation of the plant growth promoter SPGP4.

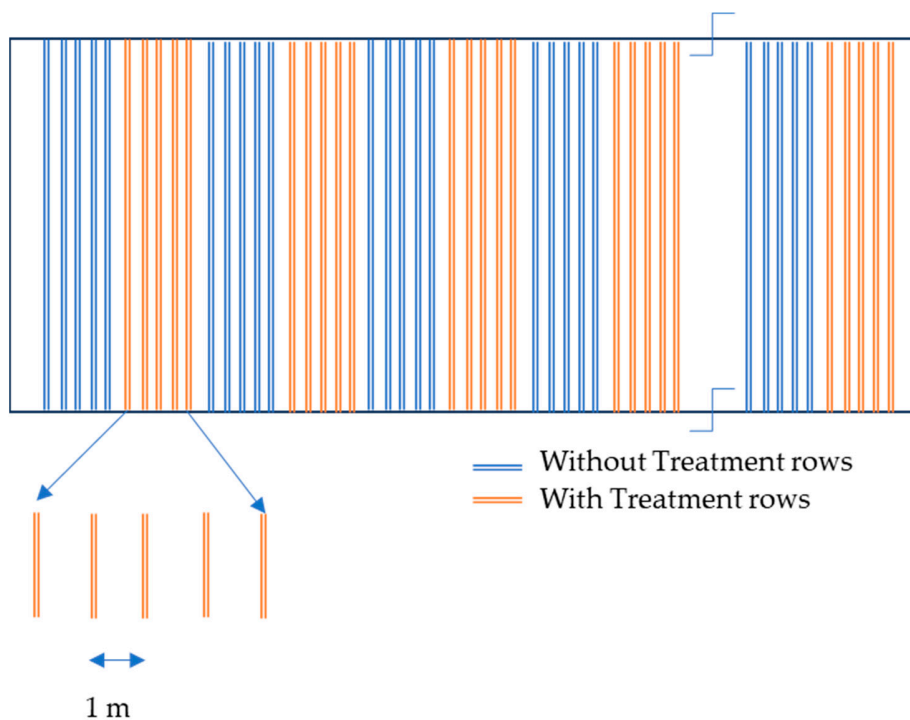

**Figure S3.** Crops design to evaluation.
